# Supplementary material for: Role of capping agents in controlling silver nanoparticles size, antibacterial activity and potential application as optical hydrogen peroxide sensor
Source: Royal Society of Chemistry journal article supplement (doi:10.1039/c6ra03766f), 2016-01-01
Supplement: c6ra03766f1.pdf [file c6ra03766f1.pdf]

**Electronic supplementary information (ESI):**

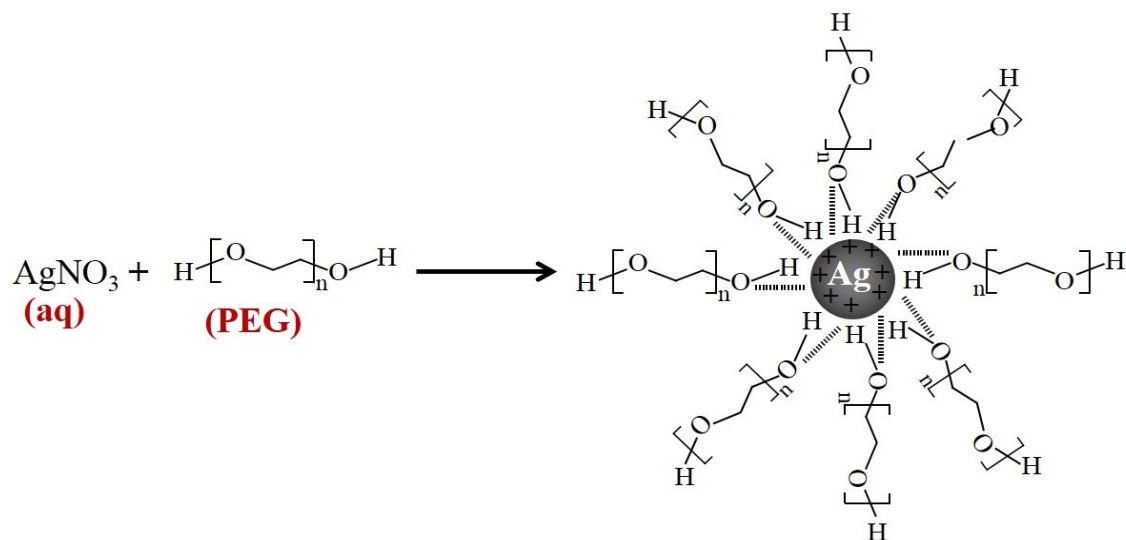

**(a) AgNPs capped by PEG**

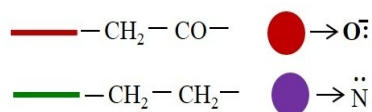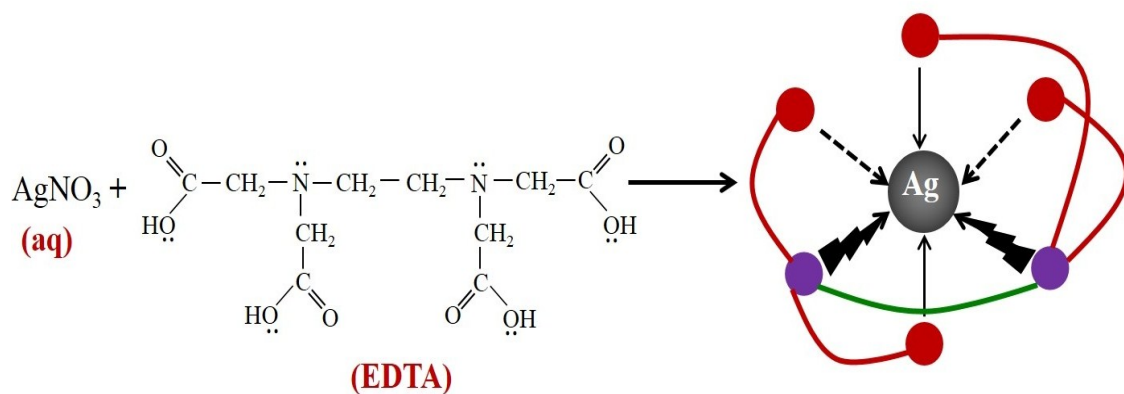

**(b) AgNPs capped by EDTA**

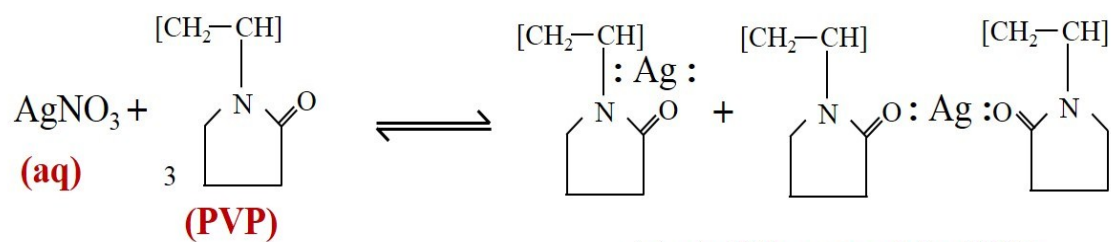

**(c) AgNPs capped by PVP**

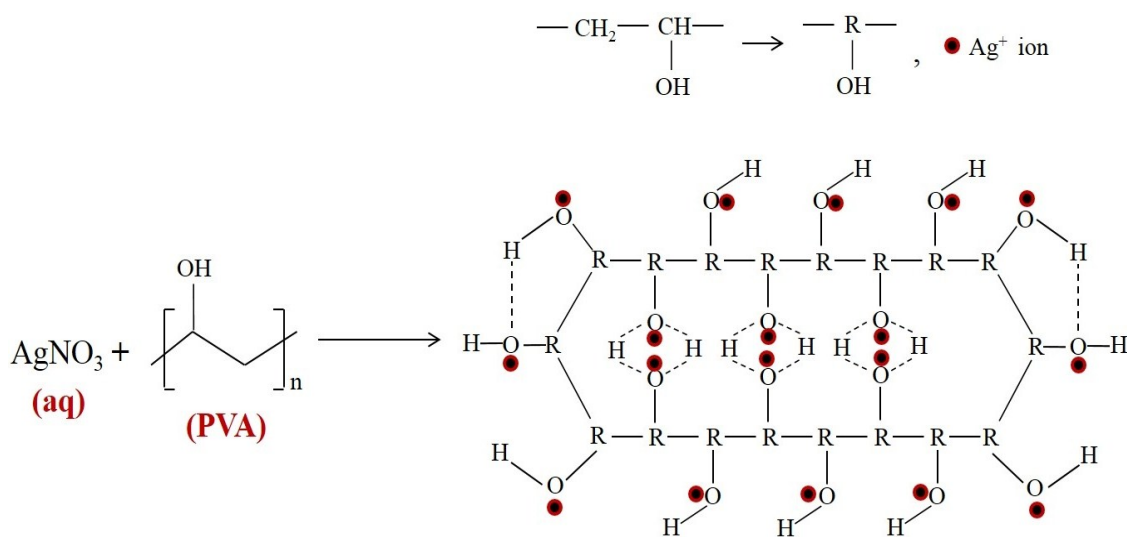

**(d) AgNPs capped by PVA**

**Fig. S1.** Schematic representation of formation of AgNPs through different capping agents (a) PEG capped AgNPs, (b) EDTA capped AgNPs, (c) PVP capped AgNPs and (d) PVA capped AgNPs.
